# Supplementary material for: Low adherence of Swiss children to national dietary guidelines
Source: PubMed Central journal article supplement (PMC4929232; doi:10.1016/j.pmedr.2016.03.004), 2016-03-08
Supplement: mmc2.pdf [file mmc2.pdf]

**Supplementary tables**

**Supplementary table 1.** Food categories

| <b>Food category</b>                 | <b>Items</b>                                                                                                                                           |
|--------------------------------------|--------------------------------------------------------------------------------------------------------------------------------------------------------|
| Fruit                                | fresh fruits, dried fruits, baked fruits and 100% fruit juices                                                                                         |
| Vegetables                           | fresh and cooked vegetables, 100% vegetable juice, vegetable soups, salads and mushrooms.                                                              |
| Milk and Dairy                       | milk, yogurt, several kind of cheese, white sauce, probiotic drinks                                                                                    |
| Sweets, Snacks and Soft drinks (SSD) | a) cookies, cakes, honey, etc.<br>b) chips, popcorn and salted snacks.<br>c) sweetened fruit juice, iced tea in a can/bottle, carbonated sugary drinks |
| Cereals and Potatoes                 | refined and whole grain cereals and potatoes                                                                                                           |
| Eggs                                 | eggs and eggs used to prepare meals (such as spätzli, crepes, flan, pancake, quiche, tortilla with potatoes)                                           |
| Fish                                 | fresh and canned fish as well as sea fruits                                                                                                            |
| Meat                                 | red and white meat, cold cuts and salami                                                                                                               |

**Supplementary table 2.** Swiss Society of Nutrition, Guidelines for children (2010).

| Food                                 | Age 4 – 6 years |                                                                                                                                   | Age 7 – 9 years |                                                                                                                                   | Age 10 – 12 years |                                                                                                                                   |
|--------------------------------------|-----------------|-----------------------------------------------------------------------------------------------------------------------------------|-----------------|-----------------------------------------------------------------------------------------------------------------------------------|-------------------|-----------------------------------------------------------------------------------------------------------------------------------|
|                                      | Portion number  | Portion size                                                                                                                      | Portion number  | Portion size                                                                                                                      | Portion number    | Portion size                                                                                                                      |
| <b>Daily</b>                         |                 |                                                                                                                                   |                 |                                                                                                                                   |                   |                                                                                                                                   |
| Fruit                                | 2               | 1 portion=100gr                                                                                                                   | 2               | 1 portion=110gr                                                                                                                   | 2                 | A portion=120gr                                                                                                                   |
| Vegetables                           | 3               | 1 portion=70gr                                                                                                                    | 3               | 1 portion=70gr                                                                                                                    | 3                 | A portion=80gr                                                                                                                    |
| Milk and dairy                       | 3               | 1 portion=1 dl of milk or 100gr of yogurt or 100gr fresh cheese (ricotta) or 15gr hard cheese or 30gr soft cheese                 | 2-3             | 1 portion=2 dl of milk or 180gr of yogurt or 200gr fresh cheese or 30gr hard cheese or 60gr soft cheese                           | 3                 | 1 portion=2 dl of milk/180gr of yogurt 200gr fresh cheese /30 g hard cheese and 60 g soft cheese                                  |
| Sweets, snacks and soft drinks (SSD) | Max.1           | 1 portion=a little slice of cake or 3 biscuits/cookies <i>petit beurre</i> or a (2dl) glass of a soft drink like iced tea or cola | Max.1           | 1 portion=a little slice of cake or 3 biscuits/cookies <i>petit beurre</i> or a (2dl) glass of a soft drink like iced tea or cola | Max.1             | 1 portion=a little slice of cake or 3 biscuits/cookies <i>petit beurre</i> or a (2dl) glass of a soft drink like iced tea or cola |
| Cereals, potatoes                    | 3/4             | 1 portion of bread=50gr<br>1 portion of (raw) rise or pasta or similar=40gr<br>1 portion of potatoes=180gr.                       | 3-4             | 1 portion of bread=65gr<br>1 portion of (raw) rice or pasta or similar=45gr<br>1 portion of potatoes=220gr.                       | 3-4               | 1 portion of bread=100gr<br>1 portion of (raw) rice or pasta or similar=60gr<br>1 portion of potatoes=270gr                       |
| <b>Weekly</b>                        |                 |                                                                                                                                   |                 |                                                                                                                                   |                   |                                                                                                                                   |
| Eggs                                 | 2               | Included those used to cook pies or custard etc.                                                                                  | 2               | Included those used to cook pies or custard etc.                                                                                  | 2-3               | Included those used to cook pies or custard etc.                                                                                  |
| Fish                                 | 1               | 1 portion=50 g                                                                                                                    | 1               | 1 portion=75gr                                                                                                                    | 1                 | 1 portion=90gr                                                                                                                    |
| Meat                                 | Max.5           | 1 portion=50gr (cold cuts or sausages maximum once a week)                                                                        | Max.5           | A portion=70gr (cold cuts or sausages maximum once a week)                                                                        | Max.5             | A portion=85gr (cold cuts or sausages maximum once a week)                                                                        |

Dietary guidelines (in Italian, French or German) can be downloaded from <http://www.sge-ssn.ch/it/io-e-te/mangiare-e-bere/giovani-e-anziani/bambini/>

**Supplemental table 3:** Comparison between children with and without complete information, N=607.

|                                         | <b>Complete (N=568)</b> | <b>Incomplete (N=39)</b> | <b>P-value</b> |
|-----------------------------------------|-------------------------|--------------------------|----------------|
| <b>Children characteristics</b>         |                         |                          |                |
| Age (years)                             | 8.5 ± 1.9               | 8.5 ± 1.8                | 0.933          |
| Girls (%)                               | 287 (50.5)              | 20 (51.3)                | 0.927          |
| Body mass index (kg/m <sup>2</sup> )    | 16.5 ± 2.6              | 16.1 ± 2.4               | 0.546          |
| <b>Reporting parent characteristics</b> |                         |                          |                |
| Age (years)                             | 41.1 ± 4.7              | 40.3 ± 4.4               | 0.390          |
| Women (%)                               | 491 (86.4)              | 34 (87.2)                | 0.897          |
| Body mass index (kg/m <sup>2</sup> )    | 23.5 ± 4.2              | 22.6 ± 4.1               | 0.285          |
| Swiss nationality (%)                   | 502 (88.4)              | 21 (67.7)                | 0.001          |
| Education (%)                           |                         |                          | 0.134 §        |
| Primary                                 | 19 (3.3)                | 2 (12.5)                 |                |
| Secondary                               | 356 (62.7)              | 9 (56.3)                 |                |
| Tertiary                                | 193 (34.0)              | 7 (31.3)                 |                |

Results are expressed as number of children (column percentage) or as mean ± standard deviation. Statistical analysis using chi-square or Fisher's exact test (§) for qualitative variables or Student's t-test for quantitative variables.

Children's adherence to nutrition guidelines

**Supplementary table 4.** Bivariate analysis of the factors associated with children's adherence to the guidelines of the Swiss society of Nutrition, Canton Ticino, 2010, all children with available data, N=607.

|                      | <b>Fruit</b> | <b>Milk &amp; dairy</b> | <b>Cereals &amp; potatoes</b> | <b>SSD</b> | <b>Eggs</b> | <b>Fish</b> | <b>Meat</b> |
|----------------------|--------------|-------------------------|-------------------------------|------------|-------------|-------------|-------------|
| All                  | 62 (10.2)    | 22 (3.6)                | 286 (47.1)                    | 60 (9.9)   | 136 (22.4)  | 414 (68.2)  | 167 (27.5)  |
| <b>Child's data</b>  |              |                         |                               |            |             |             |             |
| Age group (years)    |              |                         |                               |            |             |             |             |
| 6                    | 18 (14.8)    | 8 (6.6)                 | 68 (55.7)                     | 9 (7.4)    | 25 (20.5)   | 85 (69.7)   | 33 (27.1)   |
| 7 to 9               | 26 (8.9)     | 11 (3.8)                | 143 (49.0)                    | 30 (10.3)  | 56 (19.2)   | 196 (67.1)  | 85 (29.1)   |
| 10 to 12             | 18 (9.3)     | 3 (1.6)                 | 75 (38.9)                     | 21 (10.9)  | 55 (28.5)   | 133 (68.9)  | 49(25.4)    |
| <i>p-value</i>       | 0.178        | 0.066                   | 0.009                         | 0.570      | 0.047       | 0.851       | 0.663       |
| Gender               |              |                         |                               |            |             |             |             |
| Male                 | 22 (7.3)     | 12 (4.0)                | 144 (48.0)                    | 27 (9.0)   | 67 (22.3)   | 200 (66.7)  | 72 (24.0)   |
| Female               | 40 (13.0)    | 10 (3.3)                | 142 (46.3)                    | 33 (10.8)  | 69 (22.5)   | 214 (69.7)  | 51 (16.6)   |
| <i>p-value</i>       | 0.021        | 0.625                   | 0.667                         | 0.470      | 0.966       | 0.421       | 0.055       |
| BMI categories       |              |                         |                               |            |             |             |             |
| Underweight          | 8 (13.1)     | 1 (1.6)                 | 31 (50.8)                     | 3 (4.9)    | 14 (23.0)   | 38 (62.3)   | 15 (24.6)   |
| Healthy weight       | 42 (9.9)     | 14 (3.3)                | 207 (48.9)                    | 38 (9.0)   | 100 (23.6)  | 291 (68.8)  | 114 (26.9)  |
| Overweight           | 6 (8.6)      | 4 (5.7)                 | 28 (40.0)                     | 11 (15.7)  | 15 (21.4)   | 51 (72.9)   | 19 (27.1)   |
| Obese                | 4 (12.1)     | 1 (3.0)                 | 12 (36.4)                     | 4 (12.1)   | 5 (15.2)    | 21 (63.6)   | 11 33.3)    |
| <i>p-value</i>       | 0.762 §      | 0.615                   | 0.280                         | 0.172 §    | 0.719       | 0.559       | 0.838       |
| <b>Parent's data</b> |              |                         |                               |            |             |             |             |
| Gender               |              |                         |                               |            |             |             |             |
| Male                 | 3 (3.7)      | 3 (3.7)                 | 40 (48.8)                     | 11 (13.4)  | 19 (23.2)   | 49 (59.8)   | 15 (18.3)   |
| Female               | 59 (11.2)    | 19 (3.6)                | 246 (46.9)                    | 49 (9.3)   | 117 (22.3)  | 365 (69.5)  | 152 (28.9)  |
| <i>p-value</i>       | 0.031 §      | 1.000 §                 | 0.746                         | 0.249      | 0.858       | 0.077       | 0.044       |
| BMI categories       |              |                         |                               |            |             |             |             |
| Underweight          | 4 (11.4)     | 1 (2.9)                 | 20 (57.1)                     | 3 (8.6)    | 7 (20.0)    | 25 (71.4)   | 8 (22.8)    |
| Healthy weight       | 40 (10.4)    | 14 (3.7)                | 178 (46.4)                    | 32 (8.3)   | 82 (21.4)   | 263 (68.5)  | 120 (31.3)  |
| Overweight           | 16 (12)      | 5 (3.8)                 | 64 (48.1)                     | 18 (13.5)  | 35 (26.3)   | 94 (70.7)   | 23 (17.3)   |
| Obese                | 0 (0.0)      | 2 (4.8)                 | 20 (47.6)                     | 6 (14.3)   | 7 (16.7)    | 23 (54.8)   | 12 (28.6)   |
| <i>p-value</i>       | 0.073 §      | 0.931 §                 | 0.676                         | 0.232 §    | 0.511       | 0.256       | 0.015 §     |
| Parent's education   |              |                         |                               |            |             |             |             |
| Primary              | 2 (9.5)      | 2 (9.5)                 | 7 (33.3)                      | 2 (9.5)    | 2 (9.5)     | 13 (61.9)   | 2 (9.5)     |
| Secondary            | 33 (9.0)     | 12 (3.3)                | 170 (46.6)                    | 33 (9.0)   | 85 (23.3)   | 257 (70.4)  | 108 (29.6)  |
| Tertiary             | 25 (12.5)    | 8 (4.0)                 | 103 (51.5)                    | 23 (11.5)  | 46 (23.0)   | 131 (65.5)  | 53 (26.5.)  |
| Other                | 0 (0.0)      | 0 (0.0)                 | 4 (44.4)                      | 1 (11.1)   | 0 (0.0)     | 6 (66.7)    | 2 (22.2.0)  |

|                |           |          |           |          |            |            |            |
|----------------|-----------|----------|-----------|----------|------------|------------|------------|
| <i>p-value</i> | 0.547 §   | 0.385 §  | 0.382 §   | 0.684 §  | 0.219 §    | 0.558 §    | 0.218 §    |
| Nationality    |           |          |           |          |            |            |            |
| Non-Swiss      | 16 (21.1) | 6 (7.9)  | 34 (44.7) | 9 (11.8) | 9 (11.8)   | 52 (68.4)  | 12 (15.8)  |
| Swiss          | 44 (8.4)  | 16 (3.1) | 251 (48)  | 50 (9.6) | 124 (23.7) | 357 (68.3) | 153 (29.3) |
| <i>p-value</i> | 0.001     | 0.036    | 0.595     | 0.533    | 0.020      | 0.978      | 0.014      |

BMI, body mass index; SSD, sweets, snacks and soft drinks. Results are expressed as row percentage of adherers with each food group guideline. Statistical analysis by chi-square or Fisher's exact test (§). Analysis not performed on vegetables as no child adhered with guidelines concerning vegetables.
